# Supplementary material for: GENOME REPORT: Chromosome-scale genome assembly of the African spiny mouse (Acomys cahirinus)
Source: PubMed Central journal article supplement — bioRxiv. 2023 Apr 5:2023.04.03.535372. Preprint. [Version 1] doi: 10.1101/2023.04.03.535372 (PMC10103962; doi:10.1101/2023.04.03.535372), 2023-04-05
Supplement: NIHPP2023.04.03.535372v1-supplement-1.pdf [file NIHPP2023.04.03.535372v1-supplement-1.pdf]

## SUPPLEMENTAL FIGURES & TABLES

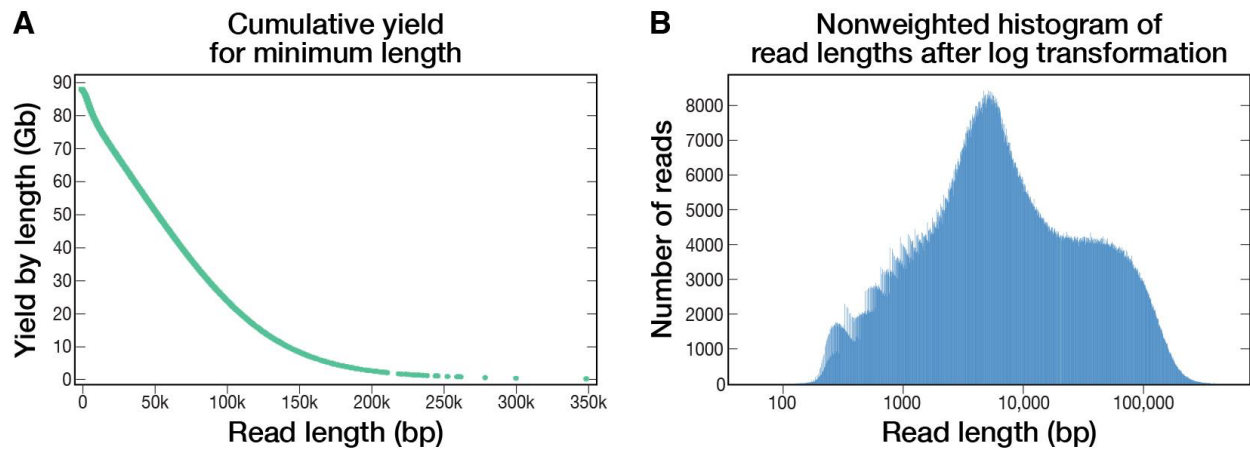

**Figure S1.** Read statistics after basecalling, generated with NanoPlot (De Coster *et al.* 2018). **(A)** Cumulative yield (in Gb) by read length. **(B)** Count of reads by length.

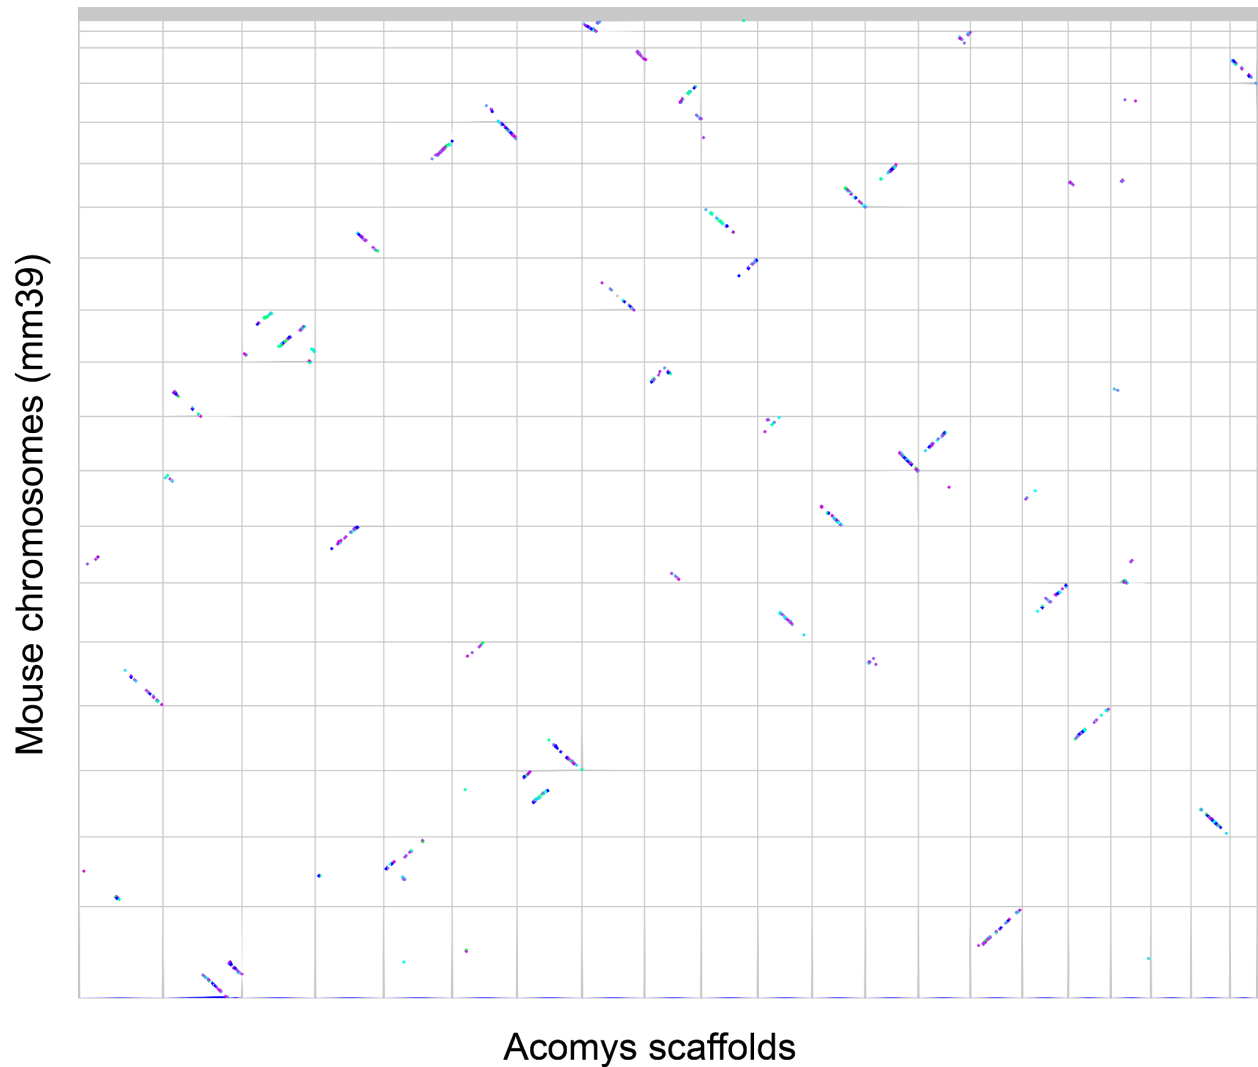

**Figure S2.** Syntenic dot plot with Kn/Ks coloration. The latest *Mus musculus* reference (mm39) is represented on the y-axis, and *Acomys cahirinus* scaffolds are on the x-axis. Grey lines separate chromosomes/scaffolds in each genome. Syntenic gene pairs are colored by the ratio of the rate of nonsynonymous to synonymous mutations (Kn/Ks), with the smallest values dark blue, followed in increasing value by violet, light blue, green, red, and orange (orange denotes  $\sim$ Kn/Ks > 1.1, which is rare in the *Acomys-Mus* comparison - see Results).

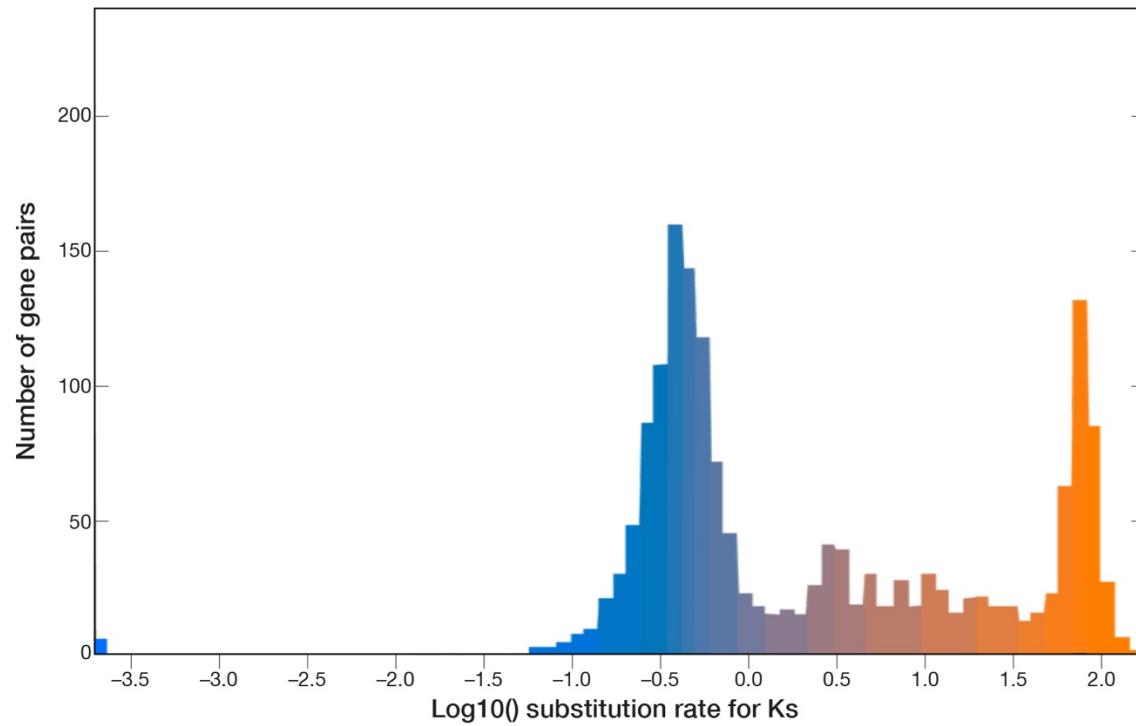

**Figure S3.** Histogram of the log10-transformed synonymous mutation (Ks) values of the syntenic gene pairs found between *Mus* (mm39) and *Acomys cahirinus*.

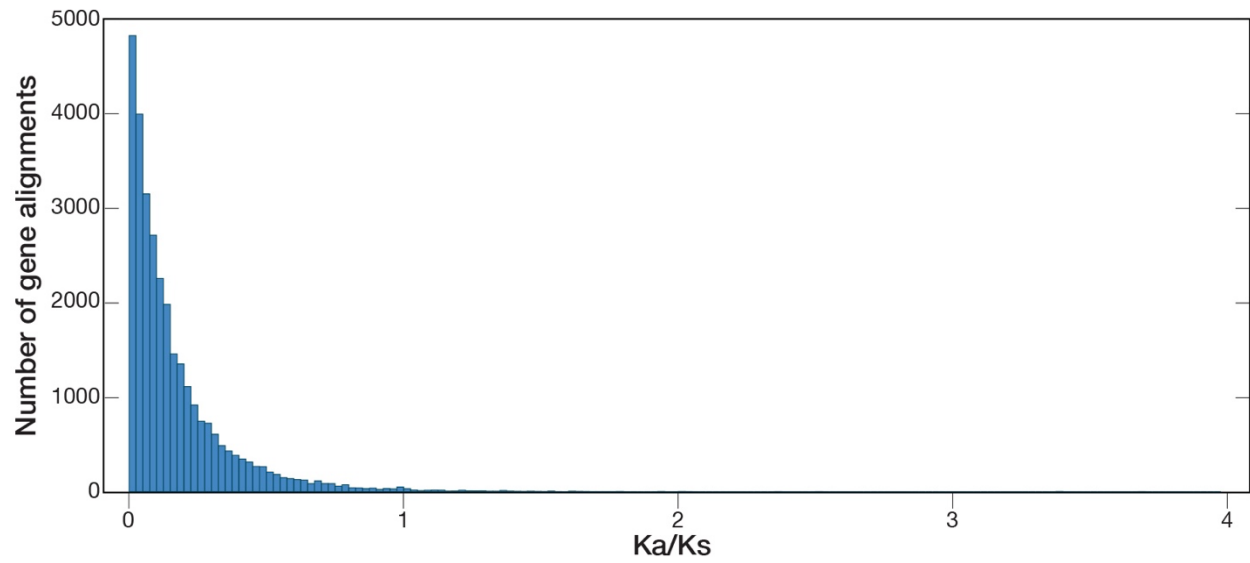

**Figure S4.** Distribution of Ka/Ks estimates for 33,197 protein-coding orthologs between *Acomys cahirinus* and *Mus musculus*. Multiple isoforms were tested for some genes.

**Table S1.** Summary of Oxford Nanopore sequencing statistics generated by NanoPlot (De Coster *et al.* 2018).

|                            |                                     |                    |
|----------------------------|-------------------------------------|--------------------|
| <b>Mean read length</b>    | 20,158                              |                    |
| <b>Mean read quality</b>   | 12.6                                |                    |
| <b>Median read length</b>  | 6,129                               |                    |
| <b>Median read quality</b> | 12.6                                |                    |
| <b>Number of reads</b>     | 4,345,343                           |                    |
| <b>Read length N50</b>     | 62,867                              |                    |
| <b>STDEV read length</b>   | 32,666                              |                    |
| <b>Total bases</b>         | 87,593,195,281                      |                    |
| <b>Quality cutoff</b>      | <b>Number of reads (%)</b>          | <b>Read length</b> |
| >Q5                        | 4,345,343 (100.0%)                  | 87,593.2 Mb        |
| >Q7                        | 4,345,166 (100.0%)                  | 87,592.9 Mb        |
| >Q10                       | 3,444,710 (79.3%)                   | 74,862.6 Mb        |
| >Q12                       | 2,483,116 (57.1%)                   | 59,723.1 Mb        |
| >Q15                       | 930,916 (21.4%)                     | 23,692.5 Mb        |
| <b>Top 5 longest reads</b> | <b>Mean base call quality score</b> |                    |
| 769,429                    | 7.4                                 |                    |
| 730,505                    | 7.3                                 |                    |
| 665,850                    | 10.8                                |                    |
| 661,387                    | 11.2                                |                    |
| 656,035                    | 7.8                                 |                    |

**Table S2.** Quast and BUSCO scores after each step of assembly, polishing, or scaffolding.

|                                     | After purging duplicates | After polishing with medaka | After polishing with pilon | After scaffolding and annotation |
|-------------------------------------|--------------------------|-----------------------------|----------------------------|----------------------------------|
| <b>Quast statistics</b>             |                          |                             |                            |                                  |
| # contigs (≥ 0 bp)                  | 181                      | 181                         | 181                        | 129                              |
| # contigs (≥ 1000 bp)               | 177                      | 177                         | 177                        | 125                              |
| # contigs (≥ 5000 bp)               | 162                      | 162                         | 162                        | 110                              |
| # contigs (≥ 10000 bp)              | 156                      | 156                         | 156                        | 104                              |
| # contigs (≥ 25000 bp)              | 147                      | 147                         | 147                        | 94                               |
| # contigs (≥ 50000 bp)              | 141                      | 141                         | 141                        | 87                               |
| Total length (≥ 0 bp)               | 2,288,116,004            | 2,289,791,246               | 2,289,253,112              | 2,289,268,912                    |
| Total length (≥ 1000 bp)            | 2,288,113,194            | 2,289,788,406               | 2,289,250,289              | 2,289,266,089                    |
| Total length (≥ 5000 bp)            | 2,288,074,385            | 2,289,749,375               | 2,289,211,425              | 2,289,227,225                    |
| Total length (≥ 10000 bp)           | 2,288,033,368            | 2,289,707,944               | 2,289,170,056              | 2,289,185,856                    |
| Total length (≥ 25000 bp)           | 2,287,894,346            | 2,289,568,906               | 2,289,031,072              | 2,289,027,872                    |
| Total length (≥ 50000 bp)           | 2,287,707,297            | 2,289,381,919               | 2,288,844,248              | 2,288,790,854                    |
| # contigs                           | 181                      | 181                         | 181                        | 129                              |
| Largest contig                      | 126,722,130              | 126,814,207                 | 126,792,893                | 212,232,915                      |
| Total length                        | 2,288,116,004            | 2,289,791,246               | 2,289,253,112              | 2,289,268,912                    |
| GC (%)                              | 43                       | 43                          | 43                         | 43                               |
| N50                                 | 58,763,166               | 58,809,824                  | 58,791,706                 | 127,770,522                      |
| N75                                 | 34,405,976               | 34,434,390                  | 34,427,997                 | 117,233,451                      |
| L50                                 | 16                       | 16                          | 16                         | 8                                |
| L75                                 | 28                       | 28                          | 28                         | 13                               |
| # N's per 100 kbp                   | 0                        | 0                           | 0                          | 1                                |
| <b>BUSCO statistics</b>             |                          |                             |                            |                                  |
| Complete BUSCOs (C)                 | 3,290 (98.0%)            | 3,300 (98.4%)               | 3,305 (98.6%)              | 3,304 (98.5%)                    |
| Complete and single-copy BUSCOs (S) | 3,218 (95.9%)            | 3,225 (96.2%)               | 3,232 (96.4%)              | 3,233 (96.4%)                    |
| Complete and duplicated BUSCOs (D)  | 72 (2.1%)                | 75 (2.2%)                   | 73 (2.2%)                  | 71 (2.1%)                        |
| Fragmented BUSCOs (F)               | 25 (0.7%)                | 19 (0.6%)                   | 15 (0.4%)                  | 16 (0.5%)                        |
| Missing BUSCOs (M)                  | 39 (1.3%)                | 35 (1.0%)                   | 34 (1.0%)                  | 34 (1.0%)                        |

**File S1.** Concatenated output from KaKs\_calculator2.0 analysis of mouse RefSeq transcripts.

**File S2.** RPKM values for RNA sequencing data from heart, liver, brain, and testis.
